# Supplementary material
Source: publisher figshare collection journal article supplement (https://gsapubs.figshare.com/ndownloader/files/23293556)
Supplement: Supplementary file 1 [file 23293556]

2  
3 **Rapid response of Helheim Glacier, south-east Greenland to early Holocene climate warming**

4 Anna L.C. Hughes\*, Eleanor Rainsley, Tavi Murray, Christopher J. Fogwill, Christoph Schnabel, Sheng Xu.

5 \*Email: a.hughes@swansea.ac.uk

---

6  
7 **Methods**

8 **Field sampling**

9 The deglaciated coastal zone of SE Greenland is virtually devoid of depositional markers of ice margin  
10 retreat and in situ terrestrial cosmogenic nuclide ( $^{10}\text{Be}$ ) exposure dating is one of the few means to constrain  
11 a glacial retreat chronology and develop our understanding of long-term outlet glacier change. Rock samples  
12 were collected during field campaigns to Sermilik Fjord, SE Greenland during July 2009 and 2010. A paired  
13 sampling strategy was employed taking samples from rounded erratic cobbles or boulders perched on  
14 polished striated streamlined bedrock surfaces at exposed sites along the fjord walls. Sample locations were  
15 reached by boat and on foot; favourable ice conditions and numerous possible landing points enabled  
16 selection of sites spanning the full length of Sermilik Fjord (Fig. DR1). Streamlined bedrock surfaces and  
17 subsamples of upper surfaces (upper 5-7 cm) of boulder and large cobble erratics were removed manually  
18 using a 4 lb lump hammer and chisel. In other cases whole erratic cobbles were collected. In each case  
19 approximately 2 kg rock was obtained per sample. Samples were obtained from low elevations but above the  
20 local marine limit (identified by the lowest level of glacial erratic cobbles and boulders) where possible, to  
21 capture the most recent occupation by ice at each site and avoid the likelihood of nuclide inheritance (Briner  
22 et al., 2009). The marine limit was recorded as at ~55 m close to the fjord mouth by Roberts et al. (2008), but  
23 the presence of erratic cobbles at ~40 m suggests that the marine limit at the mouth of Helheimfjord was  
24 slightly lower here (Table DR1). Sample SF-09-01 was taken from a site close to the mouth of the fjord  
25 below the marine limit (37 m), but is unlikely to have been submerged for a long period of time if rebound  
26 was quick. Care was taken to avoid hollows and other potential areas of snow accumulation and/or drifting.  
27 Sample location and elevation were recorded using handheld GPS receivers ( $\pm 10$  m). Topographic shielding  
28 was measured using a sighting clinometer. Sample and location details are recorded in Table DR1.

29  
30 **Analytical methods**

31 Samples were reduced to pure quartz at the University of Exeter Cosmogenic Nuclide Laboratory and the  
32 NERC Cosmogenic Isotope Analysis Facility (CIAF) at the Scottish Universities Environmental Research  
33 Centre (SUERC) following standard procedures (e.g. Stone, 2004; Kohl and Nishiizumi, 1992; Ivy Ochs,  
34 1996). Samples were run in three batches ( $n = 5$ ,  $n = 3$  and  $n = 4$ ), the first two at the CIAF and the third at  
35 the University of Exeter.  $^{10}\text{Be}$  ratios were measured by the AMS laboratory at SUERC (Xu et al., 2010).  
36 Measurements were normalised to the NIST SRM-4325 Be standard material with a revised nominal  
37  $^{10}\text{Be}/^9\text{Be}$  ratio of  $2.79 \times 10^{-11}$  (Nishiizumi et al., 2007). Samples were corrected for the  $^{10}\text{Be}/^9\text{Be}$  ratio of their

38 associated blanks (n=5, n=4 and n = 1). Blanks were spiked with 195-245  $\mu\text{g}$   $^9\text{Be}$  carrier (CIAF) and 253-  
39 254  $\mu\text{g}$   $^9\text{Be}$  carrier (University of Exeter). The corresponding combined process and carrier blanks ratios  
40 range between 3.6–5.5  $\times 10^{-15}$ . Blank corrections ranged between 3-8 % of the measured  $^{10}\text{Be}/^9\text{Be}$  ratio.  
41 Sample and blank  $^{10}\text{Be}/^9\text{Be}$  analytical uncertainties and a 2.5% carrier addition uncertainty propagated into  
42 the  $1\sigma$  analytical uncertainty for nuclide concentrations.

43

#### 44 **Age determinations**

45 Exposure ages were calculated using a version of the CRONUS-Earth online age calculator (June 2009)  
46 ([http://hess.ess.washington.edu/math/al\\_be\\_v22/Age\\_input\\_NENA\\_calib.html](http://hess.ess.washington.edu/math/al_be_v22/Age_input_NENA_calib.html)), which uses the recently  
47 revised  $^{10}\text{Be}$  half-life (1.387 Ma) (Chmeleff et al., 2010; Korschinek et al., 2010) and Be isotope ratio  
48 standardization of Nishiizumi et al. (2007), and implementing the regional  $^{10}\text{Be}$  production rate calibration  
49 dataset for NE America (Balco et al. 2009). Exposure ages are reported based on the Lal/Stone (Lal, 1991;  
50 Stone, 2000) scaling model; using the same calibration data set, ages differ by 1-4% depending on the choice  
51 of alternative scaling model (Table DR2), but the choice does not affect the estimated rate of retreat. The  
52 calculator uses sample thickness and density to standardise nuclide concentrations to the rock surface. We  
53 used an assumed density of 2.62  $\text{g cm}^{-3}$  (equivalent to the density of pure quartz). Samples from adjacent  
54 Torqwertivit Imiat Valley (TIV) with similar geological provenance had densities ranging from 2.62 to 2.74  
55  $\text{g cm}^{-3}$  (Roberts et al. 2008) and so we consider this assumption reasonable; using the calculated density of  
56 the most dense sample increases exposure ages by  $\sim 0.3\%$ . We include no correction for periodic snow  
57 cover or for rock-surface erosion, both of which are assumed to be negligible, the former due to our choice of  
58 exposed sites not conducive to snow accumulation and/or drifting. An erosion rate of  $2 \times 10^{-4} \text{ cm yr}^{-1}$  (after  
59 André, 2002) increases ages by  $\sim 2\%$  (Table DR1). No correction for post-glacial isotopic uplift has been  
60 applied, although a local relative sea level curve is available from adjacent Ammassalik Fjord,  $\sim 20$  km to the  
61 east of Sermilik Fjord (Long et al., 2008), as we expect any additional age uncertainty due to this to be  
62 similarly small (Goehring et al. in press; Kelly et al. 2008). In similar settings elsewhere in Greenland and  
63 the Arctic, most of the rebound has occurred by the time the ice is at the heads of the fjords, hence any effect  
64 is low and more importantly, the exposure history of each sample is integrated over the whole Holocene,  
65 further reducing the effect. Kelly et al. (2008) estimated 2-3% increase in ages for Early Holocene-lateglacial  
66 samples from Scoresby Sund due to  $\sim 134$  m uplift.

67

68 Choice of production rate model and scaling is often a pragmatic one and is an ongoing subject of debate.  
69 For this reason, and to facilitate comparison with other datasets and earlier work, we also report age results  
70 using the other four most commonly used scaling schemes and the CRONUS-global production rate model  
71 (Tables DR2 and DR3). The latter ages were generated using the original CRONUS-Earth calculator Version  
72 2.2 March 2009 ([http://hess.ess.washington.edu/math/al\\_be\\_v22/al\\_be\\_multiple\\_v22.php](http://hess.ess.washington.edu/math/al_be_v22/al_be_multiple_v22.php)) (Balco et al.  
73 2008). If the CRONUS-global production rate model is implemented without any calibration, ages are up to  
74 12% younger depending on the scaling scheme used. On the Lal/Stone (Lal, 1991; Stone, 2000) scheme, as  
75 reported in this paper, ages are  $\sim 12\%$  younger using the CRONUS-global rather than a calibrated production

76 rate model. Note that the rate of retreat is not dependent on the choice of production rate and the timing of  
77 retreat remains the earliest Holocene. We consider the ages based on the regional production rate calibration  
78 dataset for NE America to be more reliable than those based on the CRONUS-global production rate. Unlike  
79 the current global calibration dataset the NE American model is not dominated by high altitude, low latitude  
80 sites (Balco et al. 2009). At our low altitude, high latitude location this distinction is not trivial. Validation of  
81 the use of the NE American calibration data was demonstrated at a similar low altitude, high altitude site,  
82 Jakobshaven Isbrae in West Greenland, by comparison with ages derived from radiocarbon analysis (Young  
83 et al., 2011). Unfortunately there is not a wealth of independently calculated dates on which to corroborate  
84 ages in SE Greenland. However, two radiocarbon dates of  $8,980 \pm 130$  and  $9,890 \pm 110$   $^{14}\text{C}$  yr BP (9.9-10.3 cal.  
85 ka BP and 11.2-11.4 cal. ka; Jakobsen et al., 2008) from basal organic sediments in two lakes on the western  
86 shore of Sermilik Fjord, north of Mittivakkat Glacier, support the older ages. Using the NE American  
87 calibration data also improves the precision of the ages and reduces the differences between different scaling  
88 schemes (Tables DR2 and DR3). Recent studies from southern Norway and west Greenland indicate that a  
89 lower production rate is more realistic for these sites and that use of the CRONUS-global rate will  
90 underestimate surface ages (Goehring et al. 2011; Briner et al. in press). This further demonstrates that use of  
91 the NE American rate is appropriate in this case.

92

93 For comparison, four previously published ages from the lower TIV were recalculated using the  
94 same scaling and production rate as new ages reported in this paper (Table DR4). Two radiocarbon ages  
95 from two lakes north of Mittivakkat Glacier (Jakobsen et al. 2008) were recalibrated using Calib v.6.0.1  
96 (Stuiver and Reimer, 1993) and INTCAL09 (Reimer et al. 2009) and are reported as  $1\sigma$  ranges in the text.

97

### 98 **Discussion: erratic vs. bedrock ages**

99 To examine the relationship of bedrock and erratic ages we generated relative probability plots of the ages  
100 (Figs. DR2 and DR3). These plots show, that although the all ages overlap within 2 s.d. error, the bedrock  
101 ages are consistently older than the erratic ages and some of the bedrock ages likely contain isotopic  
102 inheritance due to insufficient erosion. We therefore have based our main conclusions in the paper solely on  
103 the erratic ages. These ages show remarkable consistency. From the relative probability plots (Fig. DR3), the  
104 youngest erratic age at the mouth of Helheimfjord could potentially reflect a minor slowdown in retreat rate  
105 as Helheim, Fenris and Midgaard glaciers separated north of the island, but more data is required to confirm  
106 this.

107

108 The finding of inheritance in the bedrock samples from Sermilik Fjord is interesting, as paired  $^{26}\text{Al}/^{10}\text{Be}$   
109 measurements indicated a simple erosion and exposure history for bedrock samples in the TIV on the west  
110 side of Sermilik Fjord (Roberts et al. 2008), with the lowest elevation sample (78 m) yielding an age similar  
111 to our mouth sample ( $12.6 \pm 1.1$  ka B.P.). The similarity of the new data with four existing ages from the  
112 TIV (Roberts et al., 2008) suggests that initial separation of the land-terminating tributary glacier occurred

113 contemporaneously with deglaciation of Sermilik Fjord. The retreat trajectories of the two glaciers after this  
114 point appear to have diverged; moraines along the TIV indicate multiple standstills of the ice front during  
115 deglaciation (Roberts et al., 2008) whereas there is no landform evidence for periodic stabilization of the  
116 glacier occupying Sermilik Fjord.

117 **Table DR1** Sample details and  $^{10}\text{Be}$  surface exposure ages from Sermilik Fjord, SE Greenland.

| Sample Name                                                                                             | AMS id | Latitude °N | Longitude °W | Sample type         | Lithology     | Elevation (m asl)* | Thickness (cm) | Shielding correction | Thickness scaling factor <sup>#</sup> | Mass (g) | Be carrier added (ml) | $^{10}\text{Be}/^9\text{Be}$ ratio <sup>†</sup> ( $\times 10^{-14}$ ) | $^{10}\text{Be}$ ( $\times 10^4$ atoms/g) <sup>§</sup> | Sigma $^{10}\text{Be}$ ( $\times 10^3$ atoms/g) | Internal uncertainty (yr) | Exposure age (zero erosion) (kyr)** | Exposure age (0.0002 cm/yr erosion) (kyr)** |
|---------------------------------------------------------------------------------------------------------|--------|-------------|--------------|---------------------|---------------|--------------------|----------------|----------------------|---------------------------------------|----------|-----------------------|-----------------------------------------------------------------------|--------------------------------------------------------|-------------------------------------------------|---------------------------|-------------------------------------|---------------------------------------------|
| Sermilik Fjord mouth, east side (2 km from fjord mouth)                                                 |        |             |              |                     |               |                    |                |                      |                                       |          |                       |                                                                       |                                                        |                                                 |                           |                                     |                                             |
| SF-09-01                                                                                                | b4781  | 65.6338     | 37.9482      | Bedrock             | Gneiss/schist | 37                 | 5              | 0.9990               | 0.9602                                | 30.1     | 0.2625                | 9.7790                                                                | 5.514                                                  | 1.25                                            | 290                       | <b>12.7 ± 0.7</b>                   | 13.0 ± 0.7                                  |
| Mid-Sermilik Fjord, west side (27 km from Sermilik Fjord mouth)                                         |        |             |              |                     |               |                    |                |                      |                                       |          |                       |                                                                       |                                                        |                                                 |                           |                                     |                                             |
| SF-09-62                                                                                                | b4483  | 65.8570     | 38.0061      | Erratic cobble      | Granodiorite  | 112                | 7              | 0.9902               | 0.9448                                | 30.2     | 0.205                 | 9.8890                                                                | 4.862                                                  | 1.68                                            | 370                       | <b>10.7 ± 0.6</b>                   | 10.9 ± 0.7                                  |
| SF-09-63                                                                                                | b4426  | 65.8569     | 38.0060      | Erratic cobble      | Granodiorite  | 110                | 7              | 0.9900               | 0.9448                                | 18.4     | 0.181                 | 6.9852                                                                | 4.983                                                  | 2.56                                            | 566                       | <b>11.0 ± 0.8</b>                   | 11.2 ± 0.8                                  |
| SF-09-64                                                                                                | b4303  | 65.8570     | 38.0062      | Streamlined bedrock | Banded gneiss | 116                | 7.5            | 0.9898               | 0.9410                                | 13.4     | 0.2266                | 4.575                                                                 | 5.596                                                  | 2.61                                            | 576                       | <b>12.3 ± 0.8</b>                   | 12.6 ± 0.9                                  |
| Mid-Sermilik Fjord, east side (57 km from Sermilik Fjord mouth)                                         |        |             |              |                     |               |                    |                |                      |                                       |          |                       |                                                                       |                                                        |                                                 |                           |                                     |                                             |
| SF-09-53                                                                                                | b4482  | 66.0599     | 37.7049      | Streamlined bedrock | Banded gneiss | 110                | 8.5            | 0.9939               | 0.9335                                | 24.9     | 0.2145                | 10.840                                                                | 5.213                                                  | 1.45                                            | 324                       | <b>11.6 ± 0.6</b>                   | 11.8 ± 0.7                                  |
| SF-09-54                                                                                                | b4300  | 66.0599     | 37.7049      | Erratic cobble      | Banded gneiss | 111                | 10             | 0.9939               | 0.9224                                | 22.2     | 0.2266                | 6.535                                                                 | 4.822                                                  | 1.70                                            | 384                       | <b>10.9 ± 0.6</b>                   | 11.0 ± 0.7                                  |
| SF-09-55                                                                                                | b4301  | 66.0599     | 37.7049      | Erratic cobble      | Banded gneiss | 110                | 10             | 0.9939               | 0.9224                                | 26.8     | 0.2266                | 8.207                                                                 | 5.018                                                  | 1.84                                            | 416                       | <b>11.3 ± 0.7</b>                   | 11.5 ± 0.7                                  |
| Island at head of Sermilik Fjord, southeast of Helheim Fjord mouth (71 km from Sermilik Fjord mouth)    |        |             |              |                     |               |                    |                |                      |                                       |          |                       |                                                                       |                                                        |                                                 |                           |                                     |                                             |
| SF-09-29                                                                                                | b4479  | 66.2262     | 37.5928      | Erratic cobble      | Banded gneiss | 76                 | 8.5            | 0.9868               | 0.9335                                | 24.9     | 0.1862                | 8.9171                                                                | 4.822                                                  | 1.32                                            | 309                       | <b>11.2 ± 0.6</b>                   | 11.5 ± 0.6                                  |
| SF-09-30                                                                                                | b4480  | 66.2263     | 37.5928      | Streamlined bedrock | Banded gneiss | 77                 | 5              | 0.9866               | 0.9602                                | 35.2     | 0.2218                | 10.880                                                                | 4.961                                                  | 1.52                                            | 346                       | <b>11.3 ± 0.6</b>                   | 11.5 ± 0.7                                  |
| Head of Sermilik Fjord, at junction between Helheim and Fenris Fjords (81 km from Sermilik Fjord mouth) |        |             |              |                     |               |                    |                |                      |                                       |          |                       |                                                                       |                                                        |                                                 |                           |                                     |                                             |
| SF-10-01                                                                                                | b4783  | 66.3185     | 37.5541      | Streamlined bedrock | Banded gneiss | 191                | 5              | 0.9978               | 0.9602                                | 30.3     | 0.2623                | 10.839                                                                | 6.056                                                  | 1.55                                            | 310                       | <b>12.1 ± 0.7</b>                   | 12.3 ± 0.7                                  |
| Helheimfjord mouth, south side (76 km from Sermilik Fjord mouth)                                        |        |             |              |                     |               |                    |                |                      |                                       |          |                       |                                                                       |                                                        |                                                 |                           |                                     |                                             |
| SF-09-03                                                                                                | b4787  | 66.2798     | 37.7261      | Streamlined bedrock | Banded gneiss | 40                 | 6.5            | 0.9946               | 0.9486                                | 32.3     | 0.2621                | 10.058                                                                | 5.266                                                  | 2.18                                            | 520                       | <b>12.5 ± 0.8</b>                   | 12.8 ± 0.8                                  |
| SF-09-04                                                                                                | b4782  | 66.2798     | 37.7261      | Erratic cobble      | Banded gneiss | 47                 | 8              | 0.9946               | 0.9373                                | 32.4     | 0.2629                | 8.2166                                                                | 4.303                                                  | 1.09                                            | 261                       | <b>10.3 ± 0.6</b>                   | 10.4 ± 0.6                                  |

118  
119  
120  
121  
122  
123  
124  
125  
126

Reference datum WGS 84.

\*m a.s.l. (metres above sea level). Elevations derived from handheld GPS units, maximum uncertainty  $\pm 10$  m. No correction applied due to lack of robust regional relative sea level curve (see text).

†Average  $^{10}\text{Be}/^9\text{Be}$  ratios of  $3.647 \times 10^{-15}$ ,  $5.477 \times 10^{-15}$  and  $5.162 \times 10^{-15}$  for fully processed blanks was subtracted from the  $^{10}\text{Be}/^9\text{Be}$  ratios of samples SF-09-29, SF-09-30, SF-09-53, SF-09-62, SF-09-63, samples SF-09-54, SF-09-55, SF-09-64, and samples SF-09-01, SF-09-03, SF-09-04 and SF-10-01 respectively.

§Samples are normalized to standard NIST SRM4325 with a certified ratio of  $2.79 \times 10^{-11}$  (07KNSTD) (Nishiizumi et al., 2007)

#Thickness correction calculated for an assumed density of  $2.62 \text{ g/cm}^3$

\*\*Exposure ages calculated using scaling scheme of Lal/Stone (Lal, 1991; Stone, 2000) using a NE American regionally calibrated production rate model (Balco et al., 2009). No correction for snow cover.

127 **Table DR2**  $^{10}\text{Be}$  ages achieved using alternative scaling schemes and calculated using the regionally calibrated North  
 128 American production rate (Balco et al. 2009). All other parameters kept the same as in Table DR1.

| Sample              | St<br>(Lal, 1991; Stone,<br>2000)* | De<br>(Desilets et al., 2006) | Du<br>(Dunai, 2001) | Li<br>(Lifton et al., 2005) | Lm<br>(Time dependent Lal,<br>1991; Stone, 2000)) |
|---------------------|------------------------------------|-------------------------------|---------------------|-----------------------------|---------------------------------------------------|
| SF-09-01            | 12.7 ± 0.7                         | 12.4 ± 0.7                    | 12.3 ± 0.7          | 12.2 ± 0.7                  | 12.9 ± 0.7                                        |
| SF-09-03            | 12.5 ± 0.8                         | 12.2 ± 0.8                    | 12.0 ± 0.8          | 12.0 ± 0.8                  | 12.7 ± 0.8                                        |
| SF-09-04            | 10.3 ± 0.6                         | 10.0 ± 0.6                    | 9.9 ± 0.5           | 9.8 ± 0.5                   | 10.4 ± 0.6                                        |
| SF-09-29            | 11.2 ± 0.6                         | 11.0 ± 0.6                    | 10.9 ± 0.6          | 10.8 ± 0.6                  | 11.4 ± 0.6                                        |
| SF-09-30            | 11.3 ± 0.6                         | 11.0 ± 0.6                    | 10.9 ± 0.6          | 10.8 ± 0.6                  | 11.4 ± 0.7                                        |
| SF-09-53            | 11.6 ± 0.6                         | 11.4 ± 0.6                    | 11.3 ± 0.6          | 11.2 ± 0.6                  | 11.8 ± 0.7                                        |
| SF-09-54            | 10.9 ± 0.6                         | 10.7 ± 0.6                    | 10.5 ± 0.6          | 10.5 ± 0.6                  | 11.0 ± 0.7                                        |
| SF-09-55            | 11.3 ± 0.7                         | 11.1 ± 0.7                    | 11.0 ± 0.7          | 10.9 ± 0.7                  | 11.5 ± 0.7                                        |
| SF-09-62            | 10.7 ± 0.6                         | 10.5 ± 0.6                    | 10.4 ± 0.6          | 10.3 ± 0.6                  | 10.8 ± 0.6                                        |
| SF-09-63            | 11.0 ± 0.8                         | 10.8 ± 0.8                    | 10.7 ± 0.8          | 10.6 ± 0.8                  | 11.1 ± 0.8                                        |
| SF-09-64            | 12.3 ± 0.8                         | 12.1 ± 0.8                    | 12.0 ± 0.8          | 11.9 ± 0.8                  | 12.5 ± 0.8                                        |
| SF-10-01            | 12.1 ± 0.7                         | 12.0 ± 0.7                    | 11.8 ± 0.7          | 11.7 ± 0.7                  | 12.3 ± 0.7                                        |
| Mean (all samples)† | 11.4 ± 0.2                         | 11.2 ± 0.2                    | 11.0 ± 0.2          | 11.0 ± 0.2                  | 11.6 ± 0.2                                        |
| Mean (erratics)†    | 10.8 ± 0.3                         | 10.6 ± 0.3                    | 10.5 ± 0.3          | 10.4 ± 0.3                  | 11.0 ± 0.3                                        |
| Mean (bedrock)†     | 12.0 ± 0.3                         | 11.8 ± 0.3                    | 11.7 ± 0.3          | 11.6 ± 0.3                  | 12.2 ± 0.3                                        |

\*From Table DR1.

†Error weighted mean and 1 s.d.

129  
130  
131

132

133 **Table DR3**  $^{10}\text{Be}$  ages derived using alternative scaling schemes calculated using the CRONUS-global production rate.

134 All other parameters kept the same as in Table DR1.

| Sample              | St<br>(Lal, 1991; Stone<br>2000) | De<br>(Desilets et al. 2006) | Du<br>(Dunai, 2001) | Li<br>(Lifton et al. 2005) | Lm<br>(Time dependent Lal,<br>1991; Stone, 2000) |
|---------------------|----------------------------------|------------------------------|---------------------|----------------------------|--------------------------------------------------|
| SF-09-01            | 11.2 ± 1.0                       | 11.7 ± 1.4                   | 11.6 ± 1.4          | 11.3 ± 1.1                 | 11.5 ± 1.0                                       |
| SF-09-03            | 11.0 ± 1.1                       | 11.4 ± 1.4                   | 11.3 ± 1.4          | 11.1 ± 1.2                 | 11.3 ± 1.1                                       |
| SF-09-04            | 9.0 ± 0.8                        | 9.4 ± 1.1                    | 9.3 ± 1.1           | 9.1 ± 0.8                  | 9.2 ± 0.8                                        |
| SF-09-29            | 9.9 ± 0.9                        | 10.3 ± 1.3                   | 10.2 ± 1.2          | 10.0 ± 1.0                 | 10.1 ± 0.9                                       |
| SF-09-30            | 9.9 ± 0.9                        | 10.3 ± 1.3                   | 10.2 ± 1.2          | 10.0 ± 1.0                 | 10.1 ± 0.9                                       |
| SF-09-53            | 10.2 ± 0.9                       | 10.7 ± 1.3                   | 10.6 ± 1.3          | 10.4 ± 1.1                 | 10.4 ± 0.9                                       |
| SF-09-54            | 9.6 ± 0.9                        | 10.0 ± 1.2                   | 9.9 ± 1.2           | 9.7 ± 1.0                  | 9.8 ± 0.9                                        |
| SF-09-55            | 10.0 ± 0.9                       | 10.4 ± 1.3                   | 10.3 ± 1.3          | 10.1 ± 1.1                 | 10.2 ± 0.9                                       |
| SF-09-62            | 9.4 ± 0.9                        | 9.9 ± 1.2                    | 9.8 ± 1.2           | 9.5 ± 1.0                  | 9.6 ± 0.9                                        |
| SF-09-63            | 9.7 ± 1.0                        | 10.1 ± 1.3                   | 10.0 ± 1.3          | 9.8 ± 1.1                  | 9.9 ± 1.0                                        |
| SF-09-64            | 10.8 ± 1.1                       | 11.4 ± 1.4                   | 11.2 ± 1.4          | 11.0 ± 1.2                 | 11.1 ± 1.1                                       |
| SF-10-01            | 10.6 ± 1.0                       | 11.2 ± 1.4                   | 13.4 ± 1.3          | 10.9 ± 1.1                 | 10.9 ± 1.0                                       |
| Mean (all samples)* | 10.0 ± 0.3                       | 10.5 ± 0.4                   | 10.4 ± 0.4          | 10.1 ± 0.3                 | 10.2 ± 0.3                                       |
| Mean (erratics)*    | 9.6 ± 0.4                        | 10.0 ± 0.5                   | 9.9 ± 0.5           | 9.6 ± 0.4                  | 9.8 ± 0.4                                        |
| Mean (bedrock)*     | 10.6 ± 0.4                       | 11.1 ± 0.6                   | 11.0 ± 0.5          | 10.7 ± 0.5                 | 10.8 ± 0.4                                       |

\*Error weighted mean and 1 s.d.

135  
136

137

138 **Table DR4**  $^{10}\text{Be}$  and  $^{26}\text{Al}$  ages from lower TIV referred to in this paper reproduced from Roberts et al. (2008) and  
 139 recalculated using the regionally calibrated NE American production rate and Lal/Stone (Lal, 1990; Stone 2000)  
 140 scaling. Original data and other parameters are documented in Roberts et al. (2008; Tables 1 and 2).

| Sample | Latitude (°N) | Longitude (°W) | Elevation (m) | $^{10}\text{Be}$ exposure age | $^{26}\text{Al}$ exposure age |
|--------|---------------|----------------|---------------|-------------------------------|-------------------------------|
| TI11   | 65.7005       | 38.1574        | 344           | 10.9 ± 0.9                    | 12.4 ± 0.9                    |
| TI14   | 65.6960       | 38.1624        | 436           | 12.5 ± 1.1                    | 13.6 ± 1.0                    |
| TI15   | 65.7054       | 38.1483        | 481           | 11.7 ± 0.9                    | --                            |
| TI17   | 65.7029       | 38.1799        | 78            | 12.6 ± 1.1                    | 10.6 ± 1.6                    |

141

142

143

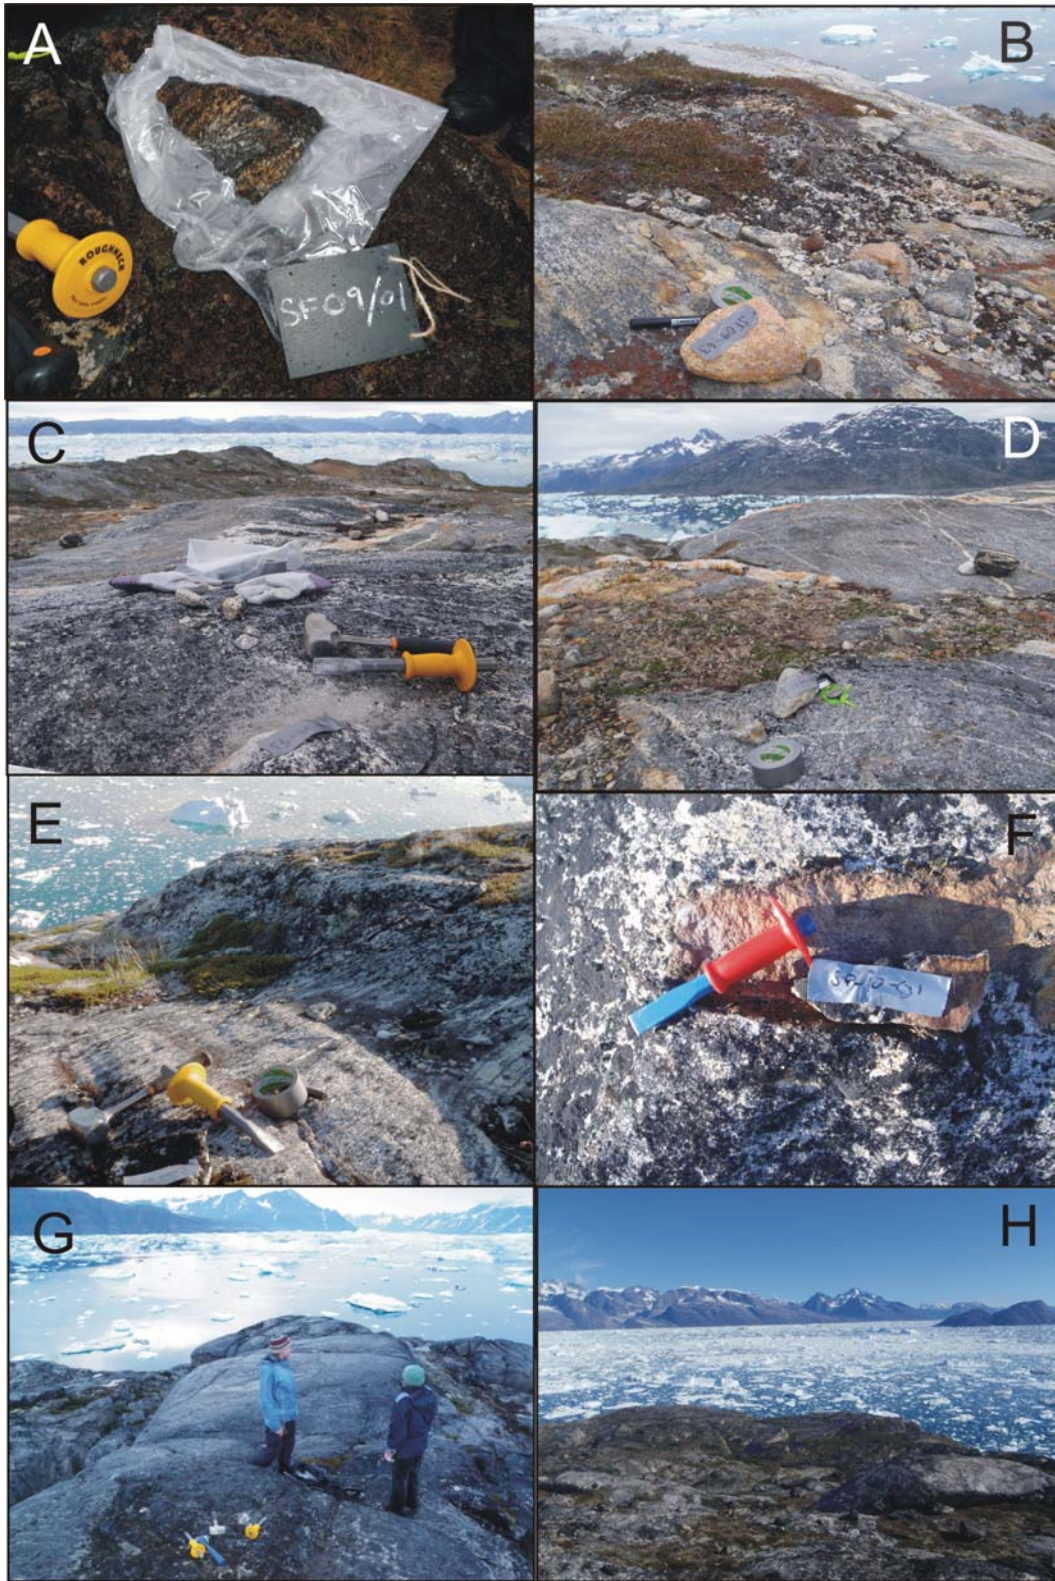

144  
 145  
 146  
 147  
 148  
 149  
 150  
 151

**Figure DR1** Photographs of samples and sampling locations. (A) SF-09-01 bedrock sample. (B) SF-09-63 erratic sample resting on streamlined bedrock. (C) SF-09-53 bedrock sample and view up Sermilik Fjord looking northwest. (D) SF-09-54 erratic sample resting on streamlined bedrock. View of upper eastern side of Sermilik Fjord. (E) SF-09-29 erratic sample from southern flank of island at head of Sermilik Fjord. (F) SF-10-01 bedrock sample from head of Sermilik Fjord. (G) SF-09-03 bedrock sample from mouth of Helheimfjord. Background shows view over junction between Helheimfjord and Sermilik Fjord, looking northeast towards Fenris Glacier. (H) View from head of Sermilik Fjord looking south.

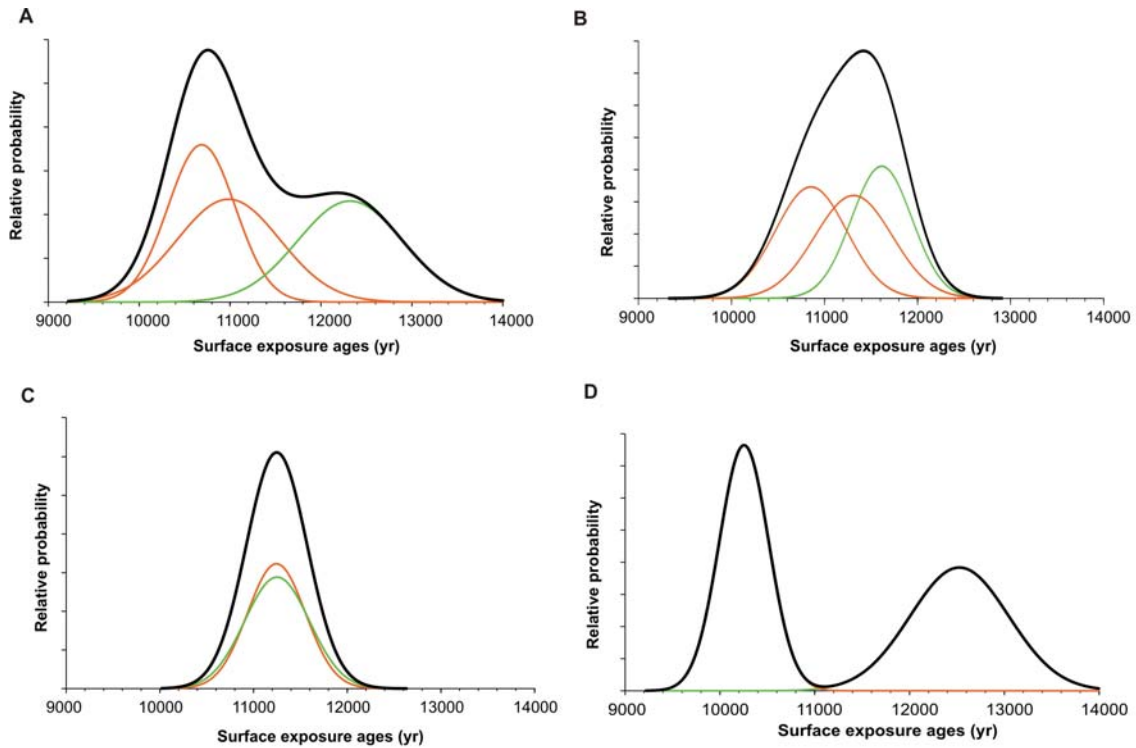

153  
 154  
 155  
 156  
 157  
 158  
 159  
 160  
 161  
 162  
 163  
 164  
 165  
 166

**Figure DR2** Relative probability ('camel') plots of exposure ages of sites where there is more than one sample. Thin lines are Gaussian distributions of exposure ages with one sigma errors (internal uncertainties only). Bedrock age distributions are shown in green, erratic distributions in orange. Thick lines represent the sum of the individual distributions. (A) SF-09-62, SF-09-63, and SF-09-64, 27 km from Sermilik Fjord mouth. Although the three ages overlap within their error bounds, the erratic ages are clustered and the bedrock age is a distinct outlier. We interpret this as minor isotopic inheritance in the bedrock sample. (B) SF-09-53, SF-09-54, SF-09-55, 52 km from Sermilik Fjord mouth. All three ages overlap and are relatively tightly clustered. Any isotopic inheritance in the bedrock sample is very minor. (C) SF-09-29 and SF-09-30 from the island at the head of Sermilik Fjord are virtually indistinguishable. (D) SF-09-03 and SF-09-04 from the mouth of Helheimfjord are the only samples that do not overlap within error and their summed distribution lies directly on top of the individual distributions. We interpret the older bedrock age as reflecting isotopic inheritance in this sample and therefore regard the erratic age as more reliable at this site. Camel plots were generated in MATLAB after Balco (2001).



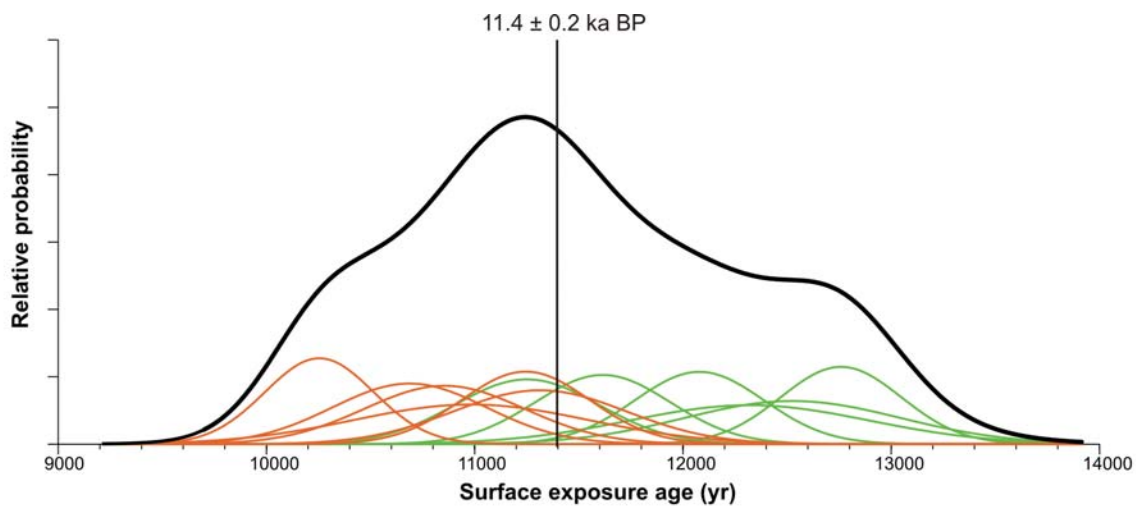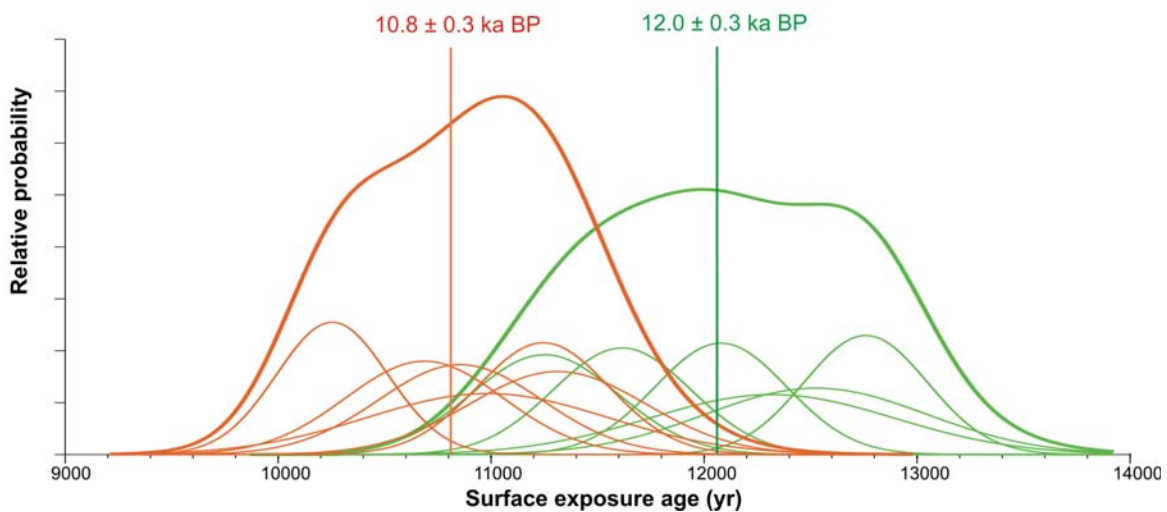

167  
168  
169  
170  
171  
172  
173  
174  
175  
176  
177

**Figure DR3** Relative probability (‘camel’) plots of exposure ages of sites where there is more than one sample. Thin lines are Gaussian distributions of exposure ages with one sigma errors (internal uncertainties only). Bedrock age distributions are shown in green, erratic distributions in orange. Thick lines represent the sum of the individual distributions. The upper plot shows the summed total of all the ages from Sermilik Fjord. The lower plot shows the erratic and bedrock ages summed separately. Vertical lines show the weighted mean and standard deviation of each population (based on both internal and external uncertainties). Camel plots were generated in MATLAB after Balco (2001).

## 178 **Supplementary References**

- 179 André, M.-F., 2002, Rates of postglacial rock weathering on glacially scoured outcrops (Abisko-Riksgränsen  
180 area, 68°N): *Geografiska Annaler*, v. 84A, p. 139-150.
- 181 Balco, G. 2001. MATLAB code for camel diagrams [online]:  
182 [http://depts.washington.edu/cosmolab/pubs/gb\\_pubs/camelplot.m](http://depts.washington.edu/cosmolab/pubs/gb_pubs/camelplot.m), Last accessed: November 2011.
- 183 Balco, G., Briner, J., Finkel, R.C., Rayburn, J.A., Ridge, J.C., and Schaefer, J.M., 2009, Regional beryllium-  
184 10 production rate calibration for late-glacial northeastern North America: *Quaternary Geochronology*, v.  
185 4, p. 93-107.
- 186 Balco, G., Stone, J.O., Lifton, N.A., and Dunai, T.J., 2008, A complete and easily accessible means of  
187 calculating surface exposure ages or erosion rates from  $^{10}\text{Be}$  and  $^{26}\text{Al}$  measurements: *Quaternary*  
188 *Geochronology*, v. 3, p. 174-195.
- 189 Briner, J.P., Bini, A.C., and Anderson, R.S., 2009, Rapid early Holocene retreat of a Laurentide outlet glacier  
190 through an Arctic fjord: *Nature Geosci*, v. 2, p. 496-499.
- 191 Briner, J.P., Young, N.E., Goehring, B.M., and Schaefer, J.M. In press. Constraining Holocene  $^{10}\text{Be}$   
192 production rates in Greenland: *Journal of Quaternary Science*.
- 193 Chmeleff, J., von Blanckenburg, F., Kossert, K., and Jakob, D., 2010, Determination of the Be-10 half-life  
194 by multicollector ICP-MS and liquid scintillation counting: *Nuclear Instruments & Methods in Physics*  
195 *Research Section B-Beam Interactions with Materials and Atoms*, v. 268, p. 192-199.
- 196 Desilets, D., Zreda, M., and Prabu, T., 2006, Extended scaling factors for in situ cosmogenic nuclides: New  
197 measurements at low latitude: *Earth and Planetary Science Letters*, v. 246, p. 265-276.
- 198 Dunai, T.J., 2001, Influence of secular variation of the geomagnetic field on production rates of in situ  
199 produced cosmogenic nuclides: *Earth and Planetary Science Letters*, v. 193, p. 197-212.
- 200 Goehring, B.M., Lohne, Ø.S., Mangerud, J., Svendsen, J.I., Gyllencreutz, R., Schaefer, J., Finkel, R., In  
201 press. Late glacial and holocene  $^{10}\text{Be}$  production rates for western Norway: *Journal of Quaternary Science*,  
202 doi: 10.1002/jqs.1517
- 203 Ivy-Ochs, S., 1996, The dating of rock surfaces using in situ produced  $^{10}\text{Be}$ ,  $^{26}\text{Al}$  and  $^{36}\text{Cl}$ , with examples  
204 from Antarctica and the Swiss Alps [PhD thesis]: Zurich, ETH.
- 205 Jakobsen, B.H., Fredskild, B., and Pedersen, J.B.T., 2008, Holocene changes in climate and vegetation in the  
206 Ammassalik area, East Greenland, recorded in lake sediments and soil profiles: *Geografisk Tidsskrift-*  
207 *Danish Journal of Geography*, v. 108, p. 21-50.
- 208 Kohl, C.P., and Nishiizumi, K., 1992, Chemical Isolation of Quartz for Measurement of In situ-Produced  
209 Cosmogenic Nuclides: *Geochimica Et Cosmochimica Acta*, v. 56, p. 3583-3587.
- 210 Korschinek, G., Bergmaier, A., Faestermann, T., Gerstmann, U.C., Knie, K., Rugel, G., Wallner, A.,  
211 Dillmann, I., Dollinger, G., von Gostomski, C.L., Kossert, K., Maiti, M., Poutivtsev, M., and Remmert,  
212 A., 2010, A new value for the half-life of Be-10 by Heavy-Ion Elastic Recoil Detection and liquid  
213 scintillation counting: *Nuclear Instruments & Methods in Physics Research Section B-Beam Interactions*  
214 *with Materials and Atoms*, v. 268, p. 187-191.

215 Lal, D., 1991, Cosmic-Ray Labelling of Erosion Surfaces – In situ Nuclide Production-Rates and Erosion  
216 Models: *Earth and Planetary Science Letters*, v. 104, p. 424-439.

217 Lifton, N.A., Bieber, J.W., Clem, J.M., Duldig, M.L., Evenson, P., Humble, J.E., and Pyle, R., 2005,  
218 Addressing solar modulation and long-term uncertainties in scaling secondary cosmic rays for in situ  
219 cosmogenic nuclide applications: *Earth and Planetary Science Letters*, v. 239, p. 140-161.

220 Long, A.J., Roberts, D.H., Simpson, M.J.R., Dawson, S., Milne, G.A., and Huybrechts, P., 2008, Late  
221 Weichselian relative sea-level changes and ice sheet history in southeast Greenland: *Earth and Planetary  
222 Science Letters*, v. 272, p. 8-18.

223 Nishiizumi, K., Imamura, M., Caffee, M.W., Southon, J.R., Finkel, R.C., and McAninch, J., 2007, Absolute  
224 calibration of Be-10 AMS standards: *Nuclear Instruments & Methods in Physics Research Section B-  
225 Beam Interactions with Materials and Atoms*, v. 258, p. 403-413.

226 Reimer, P.J., Baillie, M.G.L., Bard, E., Bayliss, A., Beck, J.W., Blackwell, P.G., Bronk Ramsey, C., Buck,  
227 C.E., Burr, G.S., Edwards, R.L., Friedrich, M., Grootes, P.M., Guilderson, T.P., Hajdas, I., Heaton, T.J.,  
228 Hogg, A.G., Hughen, K.A., Kaiser, K.F., Kromer, B., McCormac, F.G., Manning, S.W., Reimer, R.W.,  
229 Richards, D.A., Southon, J.R., Talamo, S., Turney, C.S.M., van der Plicht, J., and Weyhenmeyer, C.E.  
230 (2009) INTCAL 09 and MARINE09 radiocarbon age calibration curves, 0-50,000 years Cal BP.  
231 *Radiocarbon*: v. 51. p. 1111-1150.

232 Roberts, D.H., Long, A.J., Schnabel, C., Freeman, S., and Simpson, M.J.R., 2008, The deglacial history of  
233 southeast sector of the Greenland Ice Sheet during the Last Glacial Maximum: *Quaternary Science  
234 Reviews*, v. 27, p. 1505-1516.

235 Stone, J.O., 2000, Air pressure and cosmogenic isotope production: *Journal of Geophysical Research-Solid  
236 Earth*, v. 105, p. 23753-23759.

237 Stone, J. (2004), Extraction of Al and Be from quartz for isotopic analysis, [online]. (Available from:  
238 <http://depts.washington.edu/cosmolab/chem.html>).

239 Stuiver, M. and Reimer, P.J., 1993, Extended <sup>14</sup>C data base and revised CALIB 3.0 <sup>14</sup>C age calibration  
240 program, *Radiocarbon*, 35:215-230.

241 Xu, S., Dougans, A.B., Freeman, S.P.H.T., Schnabel, C., and Wilcken, K.M., 2010, Improved Be-10 and Al-  
242 26-AMS with a 5 MV spectrometer: *Nuclear Instruments & Methods in Physics Research Section B-  
243 Beam Interactions with Materials and Atoms*, v. 268, p. 736-738.

244 Young, N.E., Briner, J.P., Stewart, H.A.M., Axford, Y., Csatho, B., Rood, D.H., and Finkel, R.C., 2011,  
245 Response of Jakobshavn Isbrae Greenland, to Holocene climate change: *Geology*, v. 39, p. 131-134.

246  
247
